# Supplementary material
Source: publisher site journal article supplement (https://www.dovepress.com/article/467066)
Supplement: Supplementary file 1 [file get_supplementary_file.php]

***Supplementary Material***

**Supplementary Table S1.** Chromatographic Elution Conditions of QRLSD by UPLC-Q-TOF/MS

| Time (min) | Flow Rate (mL/min) | A% |
| --- | --- | --- |
| 0 | 0.4 | 0 |
| 5 | 0.4 | 0 |
| 10 | 0.4 | 5 |
| 20 | 0.4 | 9 |
| 40 | 0.4 | 14 |
| 85 | 0.4 | 27 |
| 95 | 0.4 | 45 |
| 100 | 0.4 | 70 |
| 105 | 0.4 | 95 |
| 110 | 0.4 | 95 |
| 110.1 | 0.4 | 0 |
| 120 | 0.4 | 0 |

**Supplementary Table S2.** A list of the interactions between 19 compounds from QRLSD and psoriasis-related 23 target genes.

| Compound | Gene |
| --- | --- |
|  |  |
| Caffeic acid | ALOX5 |
| Diosmetin 7-O-β-D-glucuronide | ALOX5 |
| Gentiopicroside | CDK4 |
| 8-Epiloganic acid | DPP4 |
| Diosmetin 7-O-β-D-glucuronide | DPP4 |
| Gentiopicroside | DPP4 |
| Loganic acid | DPP4 |
| Secoxyloganin | DPP4 |
| Debenzoylpaeoniflorin | DRD2 |
| Glycyrrhizic acid | DRD2 |
| 3-(4-Hydroxyphenyl) propionic acid | EGFR |
| Baicalin | EGFR |
| Caffeic acid | EGFR |
| Diosmetin 7-O-β-D-glucuronide | EGFR |
| Gentiopicroside | EGFR |
| Astilbin | F10 |
| Baicalin | F10 |
| Engeletin | F10 |
| Oxypaeoniflorin | F10 |
| Wogonoside | F10 |
| Gentiopicroside | GAPDH |
| Secologanic acid | GAPDH |
| Caffeic acid | HCAR2 |
| Astilbin | IL10 |
| Plantagoguanidinic acid | ITGB1 |
| Debenzoylpaeoniflorin | LGALS3 |
| Geniposide | LGALS3 |
| Gentiopicroside | LGALS3 |
| Oxypaeoniflorin | LGALS3 |
| Secologanic acid | LGALS3 |
| Secoxyloganin | LGALS3 |
| Astilbin | MAPK14 |
| Engeletin | MAPK14 |
| Oroxylin A-7-O-glucuronide | MAPK14 |
| Wogonoside | MAPK14 |
| Caffeic acid | NFE2L2 |
| Secoxyloganin | NOD2 |
| Gentiopicroside | PNP |
| Plantagoguanidinic acid | PNP |
| Secologanic acid | PNP |
| Wogonoside | PTPN22 |
| Debenzoylpaeoniflorin | RORC |
| 8-Epiloganic acid | SELL |
| Loganic acid | SELL |
| Plantagoguanidinic acid | SELL |
| Caffeic acid | STAT3 |
| Debenzoylpaeoniflorin | STAT3 |
| Glycyrrhizic acid | STAT3 |
| Astilbin | TNF |
| Baicalin | TNF |
| Diosmetin 7-O-β-D-glucuronide | TNF |
| Forsythoside E | TNF |
| Oroxylin A-7-O-glucuronide | TNF |
| Wogonoside | TNF |
| Astilbin | TOP2A |
| Engeletin | TOP2A |
| Astilbin | TOP2B |
| Engeletin | TOP2B |
| Debenzoylpaeoniflorin | TRPV1 |
